# Supplementary material for: First Report on Leptospira Species Isolated from Patients in Slovenia
Source: MDPI journal article supplement (doi:10.3390/microorganisms11112739), 2023-11-09
Supplement: s1 [file s1]

**Table S1.** Rabbit immune sera used for *Leptospira* serotyping.

| No. | Name of immune serum <sup>1</sup>    |
|-----|--------------------------------------|
| 1   | Australis, Australis (Ballico)       |
| 2   | Autumnalis, Autumnalis (Akiyami A)   |
| 3   | Bataviae, Bataviae, (Van Tienen)     |
| 4   | Ballum, Castellonis                  |
| 5   | Canicola, Canicola                   |
| 6   | Cynopteri, Cynopteri (3522C)         |
| 7   | Grippotyphosa, Grippotyphosa         |
| 8   | Icterohaemorrhagiae, Copenhageni     |
| 9   | Javanica, Javanica                   |
| 10  | Panama, Panama (CZ214K)              |
| 11  | Pomona, Pomona                       |
| 12  | Pyrogenes, Pyrogenes (Salinem)       |
| 13  | Semaranga, Patoc                     |
| 14  | Sejroe, Sejroe (M84)                 |
| 15  | Tarassovi, Tarassovi (Mitis Johnson) |

<sup>1</sup> Immune sera obtained from the Royal Tropical Institut, Amsterdam.

**Table S2:** Species identification of *Leptospira* strains isolated from patients in Slovenia and reference strains using PCR-Tm analysis.

| Strain                                   | Melting temperature (Tm) |       |       | Average Tm | Identification            |
|------------------------------------------|--------------------------|-------|-------|------------|---------------------------|
|                                          | Tm 1                     | Tm 2  | Tm 3  |            |                           |
| SS 166/02                                | 83.72                    | 83.68 | 83.54 | 83.61      | <i>L. interrogans</i>     |
| ČP 226/02                                | 83.75                    | 83.77 | 83.44 | 83.65      | <i>L. interrogans</i>     |
| OD 8720/11                               | 83.75                    | 83.68 | 83.68 | 83.70      | <i>L. interrogans</i>     |
| KB 185/02                                | 84.77                    | 84.81 | 84.83 | 84.65      | <i>L. kirschneri</i>      |
| VV 206/02                                | 84.81                    | 84.86 | 84.38 | 84.82      | <i>L. kirschneri</i>      |
| FF 291/02                                | 84.80                    | 84.85 | 84.21 | 84.62      | <i>L. kirschneri</i>      |
| PZ 9474/06                               | 84.80                    | 84.87 | 84.66 | 84.78      | <i>L. kirschneri</i>      |
| SS 8049/14                               | 84.45                    | 84.72 | 84.79 | 84.65      | <i>L. kirschneri</i>      |
| MJ 112721/08                             | 86.72                    | 86.65 | 86.51 | 86.62      | <i>L. borgpetersenii</i>  |
| DDA 10944/10                             | 86.68                    | 86.62 | 87.31 | 86.87      | <i>L. borgpetersenii</i>  |
| Australis Australis Ballico              | 84.09                    | 83.68 | 84.47 | 84.08      | <i>L. interrogans</i>     |
| Autumnalis Autumnalis Akiyami A          | 83.77                    | 83.49 | 83.42 | 83.56      | <i>L. interrogans</i>     |
| Bataviae Bataviae Van Tienen             | 83.73                    | 83.95 | 83.85 | 83.84      | <i>L. interrogans</i>     |
| Ballum Castellanis Castellon 3           | 86.62                    | 86.11 | 86.51 | 86.41      | <i>L. borgpetersenii</i>  |
| Canicola Canicola Hond Utrecht Iv        | 83.80                    | 83.95 | 83.90 | 83.88      | <i>L. interrogans</i>     |
| Cynopteri Cynopteri 3522c                | 84.67                    | 84.42 | 84.86 | 84.65      | <i>L. kirschneri</i>      |
| Grippothyphosa Grippytyphosa Moskvav     | 84.63                    | 84.83 | 84.59 | 84.68      | <i>L. kirschneri</i>      |
| Icterohaemorrhagiae Copenhageni Wijnberg | 83.06                    | 83.78 | 83.52 | 83.45      | <i>L. interrogans</i>     |
| Javanica Javanica Veldart Batavia 46     | 86.6                     | 86.38 | 86.45 | 86.48      | <i>L. borgpetersenii</i>  |
| Panama Panama Cz 214 K                   | 84.99                    | 84.88 | 84.57 | 84.81      | <i>L. noguchii</i>        |
| Pomona Pomona Pomona                     | 83.83                    | 84.1  | 83.97 | 83.97      | <i>L. interrogans</i>     |
| Pyrogenes Pyrogenes Salinem              | 83.96                    | 84.17 | 84.04 | 84.06      | <i>L. interrogans</i>     |
| Semarang Patoc Patoc 1                   | –                        | –     | –     | –          | not possible <sup>1</sup> |
| Sejroe Sejroe M84                        | 86.20                    | 86.60 | 86.32 | 86.37      | <i>L. borgpetersenii</i>  |
| Tarassovi Tarassovi Mitis Johnson        | 86.66                    | 86.47 | 86.63 | 86.59      | <i>L. borgpetersenii</i>  |

<sup>1</sup>Saprophytic *Leptospira* could not be amplified using primers for pathogenic *Leptospira*.

**Table S3:** Serotyping clinical and reference *Leptospira* strains using immune sera

| Strain                                   | Serogroup<br>identification | Titer      |
|------------------------------------------|-----------------------------|------------|
| SS 166/02                                | Icterohaemorrhagiae         | 1 : 800    |
| ČP 226/02                                | Icterohaemorrhagiae         | 1 : 1600   |
| OD 8720/11                               | Icterohaemorrhagiae         | 1 : 3200   |
| KB 185/02                                | Grippotyphosa               | 1 : 1600   |
| VV 206/02                                | Grippotyphosa               | 1 : 6400   |
| FF 291/02                                | Grippotyphosa               | 1 : 6400   |
| PZ 9474/06                               | Grippotyphosa               | 1 : 12 800 |
| SS 8049/14                               | Grippotyphosa               | 1 : 1600   |
| MJ 112721/08                             | Sejroe                      | 1 : 400    |
| DDA 10944/10 <sup>1</sup>                | Bataviae                    | 1 : 800    |
| LA 9525/17                               | Sejroe                      | 1:51 000   |
| PM 155/20                                | Sejroe                      | 1:800      |
| Australis Australis Ballico              | Australis                   | 1 : 12 800 |
| Autumnalis Autumnalis Akiyami A          | Autumnalis                  | 1 : 25 600 |
| Bataviae Bataviae Van Tienen             | Bataviae                    | 1 : 800    |
| Ballum Castellanis Castellon 3           | Ballum                      | 1 : 12 800 |
| Canicola Canicola Hond Utrecht Iv        | Canicola                    | 1 : 25 600 |
| Cynopteri Cynopteri 3522c                | Cynopteri                   | 1 : 800    |
| Grippothyphosa Grippotyphosa             | Grippotyphosa               | 1 : 3200   |
| Moskva V                                 |                             |            |
| Icterohaemorrhagiae Copenhageni Wijnberg | Icterohaemorrhagiae         | 1 : 1600   |
| Javanica Javanica Veldart Batavia 46     | Javanica                    | 1 : 12 800 |
| Panama Panama Cz 214 K                   | Panama                      | 1 : 12 800 |
| Pomona Pomona Pomona                     | Pomona                      | 1 : 12 800 |
| Pyrogenes Pyrogenes Salinem              | Pyrogenes                   | 1 : 800    |
| Semaranga Patoc Patoc 1                  | Semaranga                   | 1 : 12 800 |
| Sejroe Sejroe M84                        | Sejroe                      | 1 : 12 800 |
| Tarassovi Tarassovi Mitis Johnson        | Tarassovi                   | 1 : 6400   |

<sup>1</sup>Isolate taken from a South American patient who was infected with *Leptospira* while travelling through Asia. The patient became ill and was hospitalized in Slovenia.

**Table S4:** Allele numbers and sequence types (ST) of clinical and reference *Leptospira* strains

| Strain                                   | Allele number |      |      |         |          |      |      | ST            | Species                  |
|------------------------------------------|---------------|------|------|---------|----------|------|------|---------------|--------------------------|
|                                          | tpiA          | sucA | pntA | pfkB    | mreA     | glmU | caiB |               |                          |
| SS 166/02                                | 2             | 2    | 1    | 10      | 4        | 1    | 8    | 17            | <i>L. interrogans</i>    |
| ČP 226/02                                | 2             | 2    | 1    | 10      | 4        | 1    | 8    | 17            | <i>L. interrogans</i>    |
| OD 8720/11                               | 2             | 2    | 1    | 10      | 4        | 1    | 8    | 17            | <i>L. interrogans</i>    |
| KB 185/02                                | 22            | 13   | 20   | 31      | 18       | 19   | 23   | 110           | <i>L. kirschneri</i>     |
| VV 206/02                                | 22            | 13   | 20   | 31      | 18       | 19   | 23   | 110           | <i>L. kirschneri</i>     |
| FF 291/02                                | 22            | 13   | 20   | 31      | 18       | 19   | 23   | 110           | <i>L. kirschneri</i>     |
| PZ 9474/06                               | 22            | 13   | 20   | 31      | 18       | 19   | 23   | 110           | <i>L. kirschneri</i>     |
| SS 8049/14                               | 22            | 13   | 20   | 31      | 18       | 19   | 23   | 110           | <i>L. kirschneri</i>     |
| MJ 12721/08                              | 2             | 2    | 28   | 9       | 18 or 27 | 24   | 28   | Not specified | — <sup>1</sup>           |
| DDA 10944/10                             | 2             | 47   | 55   | 4 or 20 | 44       | 19   | 43   | Not specified | — <sup>1</sup>           |
| Australis Australis Ballico              | 2             | 2    | 13   | 13      | 2        | 6    | 6    | 51            | <i>L. interrogans</i>    |
| Autumnalis Autumnalis Akiyami A          | 3             | 3    | 12   | 10      | 6        | 2    | 1    | 27            | <i>L. interrogans</i>    |
| Bataviae Bataviae Van Tienen             | 2             | 2    | 8    | 9       | 7        | 6    | 5    | 50            | <i>L. interrogans</i>    |
| Ballum Castellanis Castellon 3           | 36            | 30   | 32   | 67      | 26       | 24   | 12   | 149           | <i>L. borgpetersenii</i> |
| Canicola Canicola Hond Utrecht Iv        | 3             | 3    | 3    | 4       | 5        | 3    | 5    | 37            | <i>L. interrogans</i>    |
| Cynopteri Cynopteri 3522c                | 22            | 15   | 22   | 33      | 18       | 17   | 10   | 70            | <i>L. kirschneri</i>     |
| Grippothyphosa Grippotyphosa Moskva V    | 22            | 13   | 20   | 31      | 18       | 19   | 23   | 110           | <i>L. kirschneri</i>     |
| Icterohaemorrhagiae Copenhageni Wijnberg | 2             | 2    | 1    | 10      | 4        | 1    | 8    | 17            | <i>L. interrogans</i>    |
| Javanica Javanica Veldart Batavia 46     | 34            | 30   | 27   | 67      | 27       | 24   | 11   | 143           | <i>L. borgpetersenii</i> |
| Panama Panama Cz 214 K                   | 46            | 41   | 47   | 50      | 35       | 39   | 36   | 171           | <i>L. noguchii</i>       |
| Pomona Pomona Pomona                     | 3             | 3    | 3    | 4       | 5        | 3    | 16   | 140           | <i>L. interrogans</i>    |
| Pyrogenes Pyrogenes Salinem              | 5             | 18   | 1    | 12      | 2        | 5    | 1    | 88            | <i>L. interrogans</i>    |
| Semarang Patoc Patoc 1                   | /             | /    | /    | /       | /        | /    | /    | /             | — <sup>1</sup>           |
| Sejroe Sejroe M84                        | /             | /    | /    | /       | /        | /    | /    | /             | — <sup>1</sup>           |
| Tarassovi Tarassovi Mitis Johnson        | /             | /    | /    | /       | /        | /    | /    | /             | — <sup>1</sup>           |

<sup>1</sup>Identification was not possible because the strain was not found in the applied MLST scheme.

**Table S5:** Identification of clinical and reference *Leptospira* strains using matrix-assisted laser desorption/ionisation time of flight mass spectrometry (MALDI-TOF) mass spectra.

| Species                  | Strain                            | MALDI-TOF species identification                             | MALDI-TOF score value |
|--------------------------|-----------------------------------|--------------------------------------------------------------|-----------------------|
|                          | SS 166/02                         | <i>Leptospira</i> sp. ( <i>L. interrogans</i> ) <sup>3</sup> | 1.947 <sup>3</sup>    |
|                          | ČP 226/02                         | <i>L. interrogans</i> <sup>2</sup>                           | 2.065 <sup>2</sup>    |
|                          | OD 8720/11                        | <i>L. interrogans</i> <sup>1</sup>                           | 2.503 <sup>1</sup>    |
|                          | FF 291/02                         | <i>Leptospira</i> sp. ( <i>L. interrogans</i> ) <sup>3</sup> | 1.739 <sup>3</sup>    |
|                          | SS 8049/14                        | <i>Leptospira</i> sp. ( <i>L. kirschneri</i> ) <sup>3</sup>  | 1.999 <sup>3</sup>    |
|                          | MJ 112721/08                      | <i>L. borgpetersenii</i> <sup>2</sup>                        | 2.239 <sup>2</sup>    |
|                          | DDA 10944/10                      | <i>Leptospira</i> sp. ( <i>L. santarosai</i> ) <sup>3</sup>  | 1.992 <sup>3</sup>    |
| <i>L. interrogans</i>    | Australis Australis Ballico       | <i>L. interrogans</i>                                        | 2.749                 |
| <i>L. interrogans</i>    | Autumnalis Autumnalis             | <i>L. interrogans</i>                                        | 2.537                 |
|                          | Akiyami A                         |                                                              |                       |
| <i>L. interrogans</i>    | Bataviae Bataviae Van Tienen      | <i>L. interrogans</i>                                        | 2.722                 |
| <i>L. borgpetersenii</i> | Ballum Castellanis Castellon 3    | <i>L. borgpetersenii</i>                                     | 2.630                 |
| <i>L. interrogans</i>    | Canicola Canicola Hond Utrecht    | <i>L. kirschneri</i>                                         | 2.670                 |
|                          | Iv                                | <i>L. interrogans</i>                                        | 2 609                 |
| <i>L. kirschneri</i>     | Cynopteri Cynopteri 3522C         | <i>L. interrogans</i>                                        | 2.617                 |
|                          |                                   | <i>L. kirschneri</i>                                         | 2 603                 |
| <i>L. kirschneri</i>     | Grippothyphosa Grippytyphosa      | <i>L. kirschneri</i>                                         | 2.752                 |
|                          | Moskvav                           |                                                              |                       |
| <i>L. interrogans</i>    | Icterohaemorrhagiae               | <i>L. interrogans</i>                                        | 2.833                 |
|                          | Copenhageni Wijnberg              |                                                              |                       |
| <i>L. noguchii</i>       | Panama Panama Cz 214 K            | <i>L. noguchii</i>                                           | 2.411                 |
| <i>L. borgpetersenii</i> | Sejroe Sejroe M84                 | <i>L. borgpetersenii</i>                                     | 2.623                 |
| <i>L. borgpetersenii</i> | Tarassovi Tarassovi Mitis Johnson | <i>L. borgpetersenii</i>                                     | 2.679                 |
| <i>L. interrogans</i>    | Pomona Pomona Pomona              | <i>L. interrogans</i>                                        | 2.765                 |
| <i>L. interrogans</i>    | Pyrogenes Pyrogenes Salinem       | <i>L. interrogans</i>                                        | 2.665                 |
| <i>L. biflexa</i>        | Semarang Patoc Patoc 1            | <i>L. biflexa</i>                                            | 2.683                 |

<sup>1</sup>Highly probable species identification.

<sup>2</sup>Secure genus identification, probable species identification.

<sup>3</sup>Probable genus identification.

**Table S6:** Comparison of the phenotyping and genotyping results for the reference *Leptospira* strains using five different typing methods

| Strain                               | Serotyping          | <i>NotI</i> -RFLP         | PCR-Tm                    | MLST 1                            | MALDI-TOF                                     |
|--------------------------------------|---------------------|---------------------------|---------------------------|-----------------------------------|-----------------------------------------------|
| Australis Australis Ballico          | Australis           | Australis                 | <i>L. interrogans</i>     | <i>L. interrogans</i> Australis   | <i>L. interrogans</i>                         |
| Autumnalis Autumnalis Akiyami A      | Autumnalis          | Autumnalis                | <i>L. interrogans</i>     | <i>L. interrogans</i>             | <i>L. interrogans</i>                         |
| Bataviae Bataviae Van Tienen         | Bataviae            | Bataviae                  | <i>L. interrogans</i>     | <i>L. interrogans</i>             | <i>L. interrogans</i>                         |
| Ballum Castellanis Castellon 3       | Ballum              | Not possible <sup>1</sup> | <i>L. borgpetersenii</i>  | <i>L. borgpetersenii</i> Ballum   | <i>L. borgpetersenii</i>                      |
| Canicola Canicola Hond Utrecht Iv    | Canicola            | Canicola                  | <i>L. interrogans</i>     | <i>L. interrogans</i>             | <i>L. kirschneri</i><br><i>L. interrogans</i> |
| Cynopteri Cynopteri 3522c            | Cynopteri           | Cynopteri                 | <i>L. kirschneri</i>      | <i>L. kirschneri</i>              | <i>L. interrogans</i><br><i>L. kirschneri</i> |
| Grippothyphosa                       | Grippytyphosa       | Grippytyphosa             | <i>L. kirschneri</i>      | <i>L. kirschneri</i>              | <i>L. kirschneri</i>                          |
| Grippytyphosa Moskva V               |                     |                           |                           | Grippytyphosa                     |                                               |
| Icterohaemorrhagiae                  | Icterohaemorrhagiae | Icterohaemorrhagiae       | <i>L. interrogans</i>     | <i>L. interrogans</i>             | <i>L. interrogans</i>                         |
| Copenhageni Wijnberg                 |                     |                           |                           | Icterohaemorrhagiae               |                                               |
| Javanica Javanica Veldart Batavia 46 | Javanica            | Javanica                  | <i>L. borgpetersenii</i>  | <i>L. borgpetersenii</i> Javanica | Not possible <sup>4</sup>                     |
| Panama Panama Cz 214 K               | Panama              | Panama                    | <i>L. noguchii</i>        | <i>L. noguchii</i> Panama Panama  | <i>L. noguchii</i>                            |
| Pomona Pomona Pomona                 | Pomona              | Pomona                    | <i>L. interrogans</i>     | <i>L. interrogans</i>             | <i>L. interrogans</i>                         |
| Pyrogenes Pyrogenes Salinem          | Pyrogenes           | Pyrogenes                 | <i>L. interrogans</i>     | <i>L. interrogans</i>             | <i>L. interrogans</i>                         |
| Semaranga Patoc Patoc 1              | Semaranga           | Semaranga                 | Not possible <sup>2</sup> | Not possible <sup>3</sup>         | <i>L. biflexa</i>                             |
| Sejroe Sejroe M84                    | Sejroe              | Sejroe                    | <i>L. borgpetersenii</i>  | Not possible <sup>3</sup>         | <i>L. borgpetersenii</i>                      |
| Tarassovi Tarassovi Mitis Johnson    | Tarassovi           | Not possible <sup>1</sup> | <i>L. borgpetersenii</i>  | Not possible <sup>3</sup>         | <i>L. borgpetersenii</i>                      |

MALDI-TOF = matrix-assisted laser desorption/ionisation time-of-flight mass spectrometry.

MLST 1 = multilocus sequence typing scheme 1 according to Boonsilp et al.

PCR-Tm = melting temperature PCR.

*NotI*-RFLP = *NotI*-restriction fragment length polymorphism

<sup>1</sup>*NotI*-RFLP not precisely defined.

<sup>2</sup>Saprophytic *Leptospira* could not be amplified using primers for pathogenic *Leptospira*.

<sup>3</sup>Identification not possible because strain was not found in the applied MLST scheme.

<sup>4</sup>Identification not possible because of low concentration of *Leptospira* in sample.



**Table S7:** Whole genome sequencing quality metrix for *Leptospira* strains isolated from Slovenian patients

| Sample      | species id               | KmerFinder                       | total query coverage | total template coverage | contig count | N50   | GC content | approximated genome size (Mbases) |
|-------------|--------------------------|----------------------------------|----------------------|-------------------------|--------------|-------|------------|-----------------------------------|
| SS 166/02   | <i>L. interrogans</i>    | copenhageni str.<br>FDAARGOS     | 92,68                | 99,78                   | 1104         | 73303 | 35.1       | 4.7                               |
| ČP 226/02   | <i>L. interrogans</i>    | copenhageni str.<br>FDAARGOS     | 92,68                | 99,78                   | 1102         | 79692 | 35.1       | 4.7                               |
| OD 8720/11  | <i>L. interrogans</i>    | copenhageni str.<br>FDAARGOS_203 | 92,68                | 99,77                   | 792          | 67739 | 35.1       | 4.7                               |
| FF 291/02   | <i>L. kirschnerii</i>    | strain<br>FMAS_PN5               | 60,51                | 63,55                   | 696          | 80507 | 35.9       | 4.4                               |
| SS 8049/14  | <i>L. kirschnerii</i>    | strain<br>FMAS_PN5               | 60,49                | 63,56                   | 1062         | 60528 | 36.3       | 4.5                               |
| MJ 11721/08 | <i>L. borgpetersenii</i> | FMAS_AP4                         | 85,96                | 88,75                   | 329          | 33780 | 40.2       | 3.7                               |
| DDA         |                          | serovar                          |                      |                         |              |       |            |                                   |
| 10944/10    | <i>L. santarosai</i>     | Shermani str. LT<br>821          | 75,71                | 76,11                   | 448          | 64782 | 42.2       | 3.8                               |
| LA 9525/17  | <i>L. borgpetersenii</i> | FMAS_AP4                         | 85,98                | 88,77                   | 365          | 33924 | 40.2       | 3.8                               |
| PM 155/20   | <i>L. borgpetersenii</i> | FMAS_AP4                         | 85,96                | 88,75                   | 316          | 35404 | 40.2       | 3.7                               |

**Table S8** NGS analysis results of Slovenian isolates from patients and reference *Leptospira* strains

| Sample/<br>reference id | species                  | serovar     | PubMLST<br>MLST #1 (ST) | PubMLST<br>MLST #2 (ST) | Pasteur Institute<br>cgMLST (cgST)                                                                 | loci matched <sup>1</sup> |
|-------------------------|--------------------------|-------------|-------------------------|-------------------------|----------------------------------------------------------------------------------------------------|---------------------------|
| SS 166/02               | <i>L. interrogans</i>    | copenhageni | 17                      | 47                      | 1002, 1398, 1400, 1529, <b>199</b> , 275, 749, 752, 755,<br>756, 757, 758, 759, 760, 777, 990, 997 | 546 <sup>2</sup>          |
| ČP 226/02               | <i>L. interrogans</i>    | copenhageni | 17                      | 47                      | 887                                                                                                | 544/545 (99,8%)           |
| OD 8720/11              | <i>L. interrogans</i>    | copenhageni | 17                      | 47                      | 1002, 1398, 1400, 1529, <b>199</b> , 275, 749, 752, 755,<br>756, 757, 758, 759, 760, 777, 990, 997 | 546 <sup>2</sup>          |
| FF 291/02               | <i>L. kirschnerii</i>    |             | 110                     | 100                     | 772                                                                                                | 544/545 (99,8%)           |
| SS 8049/14              | <i>L. kirschnerii</i>    |             | 110                     | 100                     | <b>771</b> +1 <sup>3</sup>                                                                         | 543/545 (99,6%)           |
| MJ 11721/08             | <i>L. borgpetersenii</i> |             | 155                     | 181                     | 783                                                                                                | 536/545 (98,3%)           |
| DDA 10944/10            | <i>L. santarosai</i>     |             | na                      | na                      | na                                                                                                 | 419/545 (76,9%)           |
| LA 9525/17              | <i>L. borgpetersenii</i> |             | 155                     | 181                     | 783                                                                                                | 536/545 (98,3%)           |
| PM 155/20               | <i>L. borgpetersenii</i> |             | 155                     | 181                     | 783                                                                                                | 536/545 (98,3%)           |

<sup>1</sup>Number of loci in isolate that matched the number of loci in cgMLST database of Institute Pasteur (% matched) (returned results after analysis at Institut Pasteur database)

<sup>2</sup>cgST compatible to isolate

<sup>3</sup> defined cgST plus one more compatible to isolates' genome

**Table S9** Kraken2 taxonomic report

| Percentage of fragments covered by the clade rooted at this taxon | Number of fragments covered by the clade rooted at this taxon | Number of fragments assigned directly to this taxon | Rank code | NCBI taxonomic ID number | Indented scientific name         |
|-------------------------------------------------------------------|---------------------------------------------------------------|-----------------------------------------------------|-----------|--------------------------|----------------------------------|
| 5.68                                                              | 620572                                                        | 620572                                              | U         | 0                        | unclassified                     |
| 94.32                                                             | 10300463                                                      | 149                                                 | R         | 1                        | root                             |
| 94.32                                                             | 10300215                                                      | 3928                                                | R1        | 131567                   | cellular organisms               |
| 94.09                                                             | 10275819                                                      | 6290                                                | D         | 2                        | Bacteria                         |
| 90.61                                                             | 9895322                                                       | 0                                                   | P         | 203691                   | Spirochaetota                    |
| 90.61                                                             | 9895322                                                       | 7                                                   | C         | 203692                   | Spirochaetia                     |
| 90.61                                                             | 9895140                                                       | 0                                                   | O         | 1643688                  | Leptospirales                    |
| 90.61                                                             | 9895140                                                       | 78                                                  | F         | 170                      | Leptospiraceae                   |
| 90.61                                                             | 9895062                                                       | 91720                                               | G         | 171                      | Leptospira                       |
| 88.63                                                             | 9679720                                                       | 8221729                                             | S         | 28183                    | Leptospira santarosai            |
|                                                                   |                                                               |                                                     |           |                          | Leptospira santarosai            |
| 13.35                                                             | 1457991                                                       | 0                                                   | S1        | 293071                   | serovar Shermani                 |
|                                                                   |                                                               |                                                     |           |                          | Leptospira santarosai            |
| 13.35                                                             | 1457991                                                       | 1457991                                             | S2        | 758847                   | serovar Shermani str. LT 821     |
| 0.49                                                              | 53917                                                         | 53917                                               | S         | 28182                    | Leptospira noguchii              |
| 0.37                                                              | 40284                                                         | 37606                                               | S         | 173                      | Leptospira interrogans           |
|                                                                   |                                                               |                                                     |           |                          | Leptospira interrogans           |
| 0.02                                                              | 1946                                                          | 1946                                                | S1        | 312175                   | serovar Bataviae                 |
|                                                                   |                                                               |                                                     |           |                          | Leptospira interrogans           |
| 0.00                                                              | 363                                                           | 363                                                 | S1        | 338215                   | serovar Bratislava               |
|                                                                   |                                                               |                                                     |           |                          | Leptospira interrogans           |
| 0.00                                                              | 286                                                           | 286                                                 | S1        | 214675                   | serovar Manilae                  |
|                                                                   |                                                               |                                                     |           |                          | Leptospira interrogans           |
| 0.00                                                              | 35                                                            | 23                                                  | S1        | 44275                    | serovar Copenhageni              |
|                                                                   |                                                               |                                                     |           |                          | Leptospira interrogans           |
|                                                                   |                                                               |                                                     |           |                          | serovar Copenhageni str. Fiocruz |
| 0.00                                                              | 12                                                            | 12                                                  | S2        | 267671                   | L1-130                           |

|      |       |       |    |         |                                                     |
|------|-------|-------|----|---------|-----------------------------------------------------|
| 0.00 | 25    | 2     | S1 | 176     | Leptospira interrogans<br>serovar Hardjo            |
| 0.00 | 15    | 15    | S2 | 38347   | Leptospira interrogans<br>serovar Hardjo-prajitno   |
| 0.00 | 8     | 8     | S2 | 1279460 | Leptospira interrogans<br>serovar Hardjo str. Norma |
| 0.00 | 10    | 10    | S1 | 211880  | Leptospira interrogans<br>serovar Canicola          |
| 0.00 | 8     | 2     | S1 | 57678   | Leptospira interrogans<br>serovar Lai               |
| 0.00 | 4     | 4     | S2 | 189518  | Leptospira interrogans<br>serovar Lai str. 56601    |
| 0.00 | 2     | 2     | S2 | 573825  | Leptospira interrogans<br>serovar Lai str. IPAV     |
| 0.00 | 5     | 0     | S1 | 290341  | Leptospira interrogans<br>serovar Linhai            |
| 0.00 | 5     | 5     | S2 | 1395589 | Leptospira interrogans<br>serovar Linhai str. 56609 |
| 0.10 | 11416 | 11416 | S  | 28184   | Leptospira weilii                                   |
| 0.09 | 9498  | 9497  | S  | 1137606 | Leptospira mayottensis                              |
| 0.00 | 1     | 1     | S1 | 1192864 | Leptospira mayottensis<br>200901116                 |
| 0.05 | 5771  | 5733  | S  | 174     | Leptospira borgpetersenii                           |
| 0.00 | 32    | 32    | S1 | 280504  | Leptospira borgpetersenii<br>serovar Javanica       |
| 0.00 | 6     | 6     | S1 | 508536  | Leptospira borgpetersenii<br>serovar Ceylonica      |
| 0.01 | 1009  | 1009  | S  | 29507   | Leptospira kirschneri                               |
| 0.01 | 862   | 862   | S  | 408139  | Leptospira kmetyi                                   |
| 0.01 | 754   | 754   | S  | 2564040 | Leptospira tipperaryensis                           |
| 0.00 | 65    | 0     | G1 | 2633828 | unclassified Leptospira                             |
| 0.00 | 53    | 53    | S  | 1513297 | Leptospira sp. GIMC2001                             |

|      |    |    |    |         |                            |
|------|----|----|----|---------|----------------------------|
| 0.00 | 12 | 12 | S  | 2838238 | Leptospira sp. mild_001    |
| 0.00 | 41 | 41 | S  | 1917830 | Leptospira kobayashii      |
| 0.00 | 5  | 0  | S  | 172     | Leptospira biflexa         |
|      |    |    |    |         | Leptospira biflexa serovar |
| 0.00 | 5  | 5  | S1 | 145259  | Patoc                      |

**Table S10** Reference sequences of *Leptospira* strains used for phylogenetic analysis.

| Sample/<br>reference id | species                  | serovar             |
|-------------------------|--------------------------|---------------------|
| GCF_014858915.1         | <i>L. interrogans</i>    | Canicola            |
| GCF_002073495.2         | <i>L. interrogans</i>    | copenhageni         |
| GCF_000216355.1         | <i>L. interrogans</i>    | pomona              |
| GCF_001995205.1         | <i>L. interrogans</i>    | australis           |
| GCF_000244055.1         | <i>L. interrogans</i>    | autumnalis          |
| GCF_000243515.1         | <i>L. interrogans</i>    | pyrogenes           |
| GCF_014858935.1         | <i>L. interrogans</i>    | bataviae            |
| GCF_014858895.1         | <i>L. interrogans</i>    | icterohaemorrhagiae |
| GCF_000244115.1         | <i>L. interrogans</i>    | hebdomadis          |
| GCF_001010765.1         | <i>L. interrogans</i>    | bratislava          |
| GCF_015162955.1         | <i>L. borgpetersenii</i> | tarassovi           |
| GCF_003046425.1         | <i>L. borgpetersenii</i> | javanica            |
| GCF_000244495.1         | <i>L. borgpetersenii</i> | castellonis         |
| GCF_000243695.2         | <i>L. kirschnerii</i>    | cynopteri           |
| GCF_000243855.1         | <i>L. kirschnerii</i>    | grippotyphosa       |
| GCF_000313175.2         | <i>L. santarosai</i>     | shermani            |
| GCF_000306255.2         | <i>L. noguchii</i>       | panama              |
| GCF_000017685.1         | <i>L. biflexa</i>        | patoc1              |
